# Supplementary material
Source: Springer Nature journal article supplement (https://www.springermedizin.de/resource/supplementary/12974_2010_278_MOESM1_ESM.pdf/9601148)

Cell Volume  
( $\mu\text{l}/\text{mg Protein}$ )

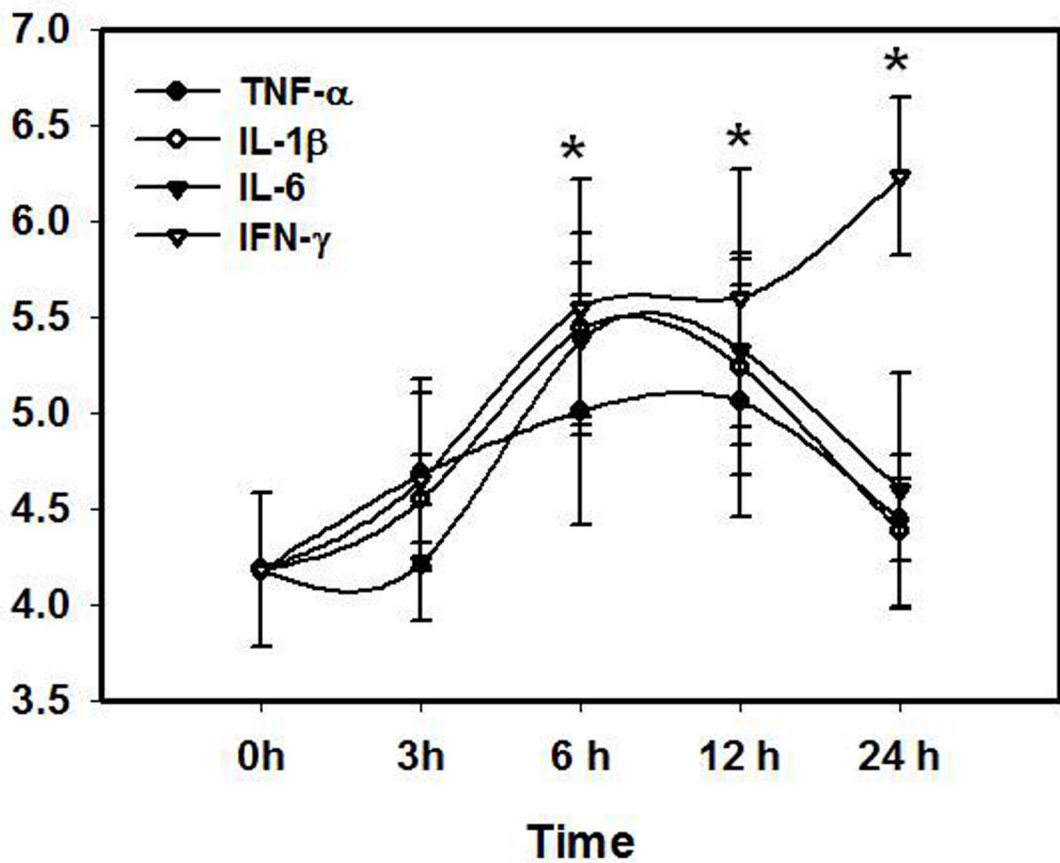

Supplement: MOESM1 [file 9601148]
